# Supplementary material
Source: HighWire-hosted journal article supplement (https://tobaccocontrol.bmj.com/content/26/e1/e37)
Supplement: inline-supplementary-material-1 [file inline-supplementary-material-1.pdf]

**Supplementary Table 1: Ongoing Clinical Trials of Very Low Nicotine Content Cigarettes**

| PI(s)               | Clinical Trial # | Purpose (derived from clinicaltrials.gov and personal communication)                                                                                                                                                                             | Sample size | Estimated Completion Date |
|---------------------|------------------|--------------------------------------------------------------------------------------------------------------------------------------------------------------------------------------------------------------------------------------------------|-------------|---------------------------|
| Shiffman            | NCT02228824      | To investigate the impact of different nicotine levels in cigarettes among non-daily smokers.                                                                                                                                                    | 455         | June, 2016                |
| Hatsukami           | NCT02139930      | To compare two different approaches to reducing levels of nicotine in cigarettes: an immediate reduction in nicotine content in cigarettes vs. a gradual reduction in nicotine content in cigarettes.                                            | 1250        | August, 2016              |
| Donny               | NCT02301325      | To evaluate the impact of very low nicotine content cigarettes with and without transdermal nicotine.                                                                                                                                            | 240         | December, 2016            |
| Richie              | NCT02415270      | To determine the short term effects of switching to tobacco products that deliver low levels of nicotine or reactive oxygen/nitrogen species (ROS/RNS) on smoking behavior and biomarkers of tobacco smoke exposure and oxidative stress.        | 70          | May, 2017                 |
| Rohsenow            | NCT01989507      | To determine the impact of very low nicotine content cigarettes in smokers with current or past year substance use disorders.                                                                                                                    | 250         | May, 2018                 |
| Tidey               | NCT02019459      | To examine whether reducing the nicotine content of cigarettes to non-addicting levels is a viable method of reducing smoking in smokers with schizophrenia.                                                                                     | 80          | August, 2018              |
| Foulds & Evins      | NCT01928758      | To evaluate the effect of progressive nicotine reduction in cigarettes on smoking behavior, toxin exposure and psychiatric symptoms in smokers with comorbid mood and/or anxiety disorders.                                                      | 280         | October, 2018             |
| Muscat & Horn       | NCT01928719      | To address the question of whether progressively lowering nicotine content in cigarettes can reduce or eliminate nicotine dependence in smokers of low socioeconomic status.                                                                     | 400         | October, 2018             |
| Oncken              | NCT02048852      | To examine the potential effect of reducing nicotine content or menthol or both in women of reproductive age.                                                                                                                                    | 320         | December, 2018            |
| Oncken & Dornelas   | NCT02592772      | To examine the potential effect of reducing nicotine content or menthol or both in men. It will also examine whether there are gender differences in manipulating tobacco flavors and nicotine concentrations in cigarettes on smoking behavior. | 57          | December, 2018            |
| Higgins & Heil      | NCT02250534      | To examine the impact of extended exposure to cigarettes varying in nicotine content among disadvantaged women.                                                                                                                                  | 405         | August, 2019              |
| Stitzer             | NCT02250664      | To examine the impact of extended exposure to cigarettes varying in nicotine content among opioid abusers.                                                                                                                                       | 405         | August, 2019              |
| Tidey               | NCT02232737      | To examine the impact of extended exposure to cigarettes varying in nicotine content to people with current affective disorders.                                                                                                                 | 405         | August, 2019              |
| Kollins & McClernon | NCT02599571      | To investigate the impact of different nicotine levels in cigarettes with individuals who have ADHD.                                                                                                                                             | 350         | March, 2020               |

|        |             |                                                                                                                                                                                                             |     |             |
|--------|-------------|-------------------------------------------------------------------------------------------------------------------------------------------------------------------------------------------------------------|-----|-------------|
| Drobes | NCT02796391 | To determine the impact of gradual vs. immediate reduction of nicotine content in cigarettes, in combination with a targeted behavioral treatment protocol, on smoking cessation and intermediate outcomes. | 208 | March, 2021 |
|--------|-------------|-------------------------------------------------------------------------------------------------------------------------------------------------------------------------------------------------------------|-----|-------------|

Studies found at Clinicaltrials.gov on or before August 19, 2016. Studies listed as “completed” or with N<50 were omitted.
